- und Alkoholbelastungen. *Anaesthesist* 15: 349-355, 1966
35. Hannington-Kiff JG: Measurement of recovery from outpatient general anaesthesia with a simple ocular test. *Br Med J* 3:132-135, 1970
36. Kreisler H: Zur Strassenverkehrstüchtigkeit nach Anwendung von Propanidid. *Anesthesiologie und Resuscitation* 4:293-298, 1965
37. Howells TH: Intravenous anaesthetic agents in dental anaesthesia. *Br J Anaesth* 40: 182-187, 1968
38. Doenicke A, Krumei I, Kugler J, et al: Experimental studies of the breakdown of Epontol: Determination of propanidid in human serum. *Br J Anaesth* 40:415-429, 1968
39. Doenicke A, Kugler J, Kalmar L, et al: Klinisch-experimentelle Untersuchungen mit Propanidid. *Anaesthesist* 22:255-262, 1973
40. Schienle C: Strassenverkehrstauglichkeit nach Kurznarkosen mit Propanidid. *Med Diss Erlangen-Nürnberg*, 1966
41. Rittmeyer P: Weitere Untersuchungen zur Frage der Strassenverkehrstüchtigkeit nach Propanidid-Narkosen. *Anesthesiologie und Resuscitation* 4:298-301, 1965
42. Swerdlow M, Moore BA: A dose-duration trial with propanidid. *Br J Anaesth* 39:573-577, 1967
43. Clarcé RSJ, Montgomery SJ, Dundee JW, et al: Clinical studies of induction agents. XXXI. A new steroid anaesthetic. *Br J Anaesth* 40: 947-952, 1971
44. Child KJ, Currie JP, Davis P, et al: The pharmacological properties in animals of CT 1341—a new steroid anaesthetic agent. *Br J Anaesth* 43:2-13, 1971
45. Child KJ, Gibson W, Hamby G, et al: Metallophilism and excretion of Althesin (CT 1341) in the rat. *Postgrad Med J* 48 suppl 2:37-41, 1972
46. Kavan EM, Juhen RM, Elliot HW: Central nervous system effects of Althesin (CT 1341). A new steroid anaesthetic agent. *Can Anaesth Soc J* 20:528-538, 1973
47. Swerdlow M: Althesin—a new intravenous anaesthetic. *Can Anaesth Soc J* 20:186-191, 1973
48. Hannington-Kiff JG: Comparative recovery rates following induction of anaesthesia with Althesin and methohexitone in out-patients. *Postgrad Med J* 48 suppl 2:116-117, 1972

## Transfusion

**TREATMENT OF INCOMPATIBLE BLOOD REACTION** A 15-year-old white girl weighing 50 kg suffered multiple stab wounds to the chest and neck. During a two-hour period, she received 3,000 ml of A-positive blood. At this time, urine became deep red and arterial pressure began to decrease. At this time also the blood bank notified the authors that the patient's blood type was actually O-positive. Treatment with mannitol, O-positive packed cells, and crystalloid was instituted. Within 20 minutes, blood pressure was unobtainable and urinary output had ceased. Hemolysis, coagulopathy, and renal shutdown ensued. The authors undertook to provide massive hemodilution under moderate hypothermia and cardiopulmonary bypass. The patient was heparinized, a pump oxygenator system was primed with 4 liters of electrolyte solution containing sodium bicarbonate and calcium chloride, and cannulas were placed in the venae cavae and aorta. Bypass was instituted within three hours of admission. The pa-

tient's temperature was lowered to 27°C. Hemodilution progressed, resulting in hematocrit of 3 per cent within one hour after institution of bypass. The patient was then given a transfusion of O-positive erythrocytes while metabolic acidosis was corrected with appropriate infusions of bicarbonate. Clear urine began to appear and cardiopulmonary bypass was discontinued approximately three hours after its institution. Five and a half hours elapsed from the time massive transfusion reaction was diagnosed until the completion of operation. At the completion of operation, the patient was awake and responding. Following a period of controlled and intermittent mandatory ventilation, she made an uneventful recovery. She was discharged 14 days after admission without symptoms. The authors believe the patient represents the first survivor of a transfusion reaction following 3,000 ml of ABO-incompatible blood. (Seager, OA, and others: *Massive acute hemodilution for incompatible blood reaction*. *JAMA* 229:790-792, 1974.)
